# Supplementary material for: Effects of Elastic Resistance Exercise on Postoperative Outcomes Linked to the ICF Core Sets for Osteoarthritis after Total Knee Replacement in Overweight and Obese Older Women with Sarcopenia Risk: A Randomized Controlled Trial
Source: J Clin Med. 2020 Jul 11;9(7):2194. doi: 10.3390/jcm9072194 (PMC7408891; doi:10.3390/jcm9072194)
Supplement: Supplementary file 1 [file jcm-09-02194-s001.pdf]

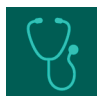

## Supplementary file

**Table S1.** Elastic resistance exercise.

| Movement                                                   | Training volume<br>(repetition × set) | Targeted muscle<br>group               | Duration<br>(min) |
|------------------------------------------------------------|---------------------------------------|----------------------------------------|-------------------|
| <b>A. Warm-up</b>                                          |                                       |                                        |                   |
| 1. Mobility exercise of the neck,<br>upper limbs, and back |                                       | Upper quarter flexors<br>and extensors | 5                 |
| 2. Global flexion-extension of the<br>lower limb           |                                       | Lower quarter flexors<br>and extensors | 5                 |
| <b>B. Upper quarter</b>                                    |                                       |                                        |                   |
| 1. Seated chest press                                      | 10–20 × 3                             | Upper quarter<br>extensors             | 5–10              |
| 2. Seated row                                              | 10–20 × 3                             | Upper quarter flexors                  | 5–10              |
| 3. Seated shoulder press                                   | 10–20 × 3                             | Shoulder girdle<br>muscle groups       | 5–10              |
| <b>C. Lower quarter</b>                                    |                                       |                                        |                   |
| 1. Concentric–eccentric hip<br>circumduction               | 10–20 × 3                             | Hip girdle muscle<br>groups            | 5–10              |
| 2. Leg press                                               | 10–20 × 3                             | Lower quarter<br>extensors             | 5–10              |
| 3. Leg curl                                                | 10–20 × 3                             | Lower quarter flexors                  | 5–10              |
| <b>D. Cool down</b>                                        |                                       |                                        | 5                 |

**Table 2.** Exercise progression protocol.

|                  | Week             | 1     | 2     | 3     | 4     | 5     | 6     | 7     | 8     |
|------------------|------------------|-------|-------|-------|-------|-------|-------|-------|-------|
| Theraband color  | Yellow           | X     | X     |       |       |       |       |       |       |
|                  | Red              |       |       | X     | X     |       |       |       |       |
|                  | Green            |       |       |       |       | X     | X     |       |       |
|                  | Blue             |       |       |       |       |       |       | X     | X     |
|                  | Black            |       |       |       |       |       |       |       |       |
|                  | Silver           |       |       |       |       |       |       |       |       |
| Exercise loading | Repetition       | 10    | 20    | 10    | 20    | 10    | 20    | 10    | 20    |
|                  | Set              | 3     | 3     | 3     | 3     | 3     | 3     | 3     | 3     |
|                  | RPE <sup>a</sup> | 13–14 | 14–15 | 13–14 | 14–15 | 13–14 | 14–15 | 13–14 | 14–15 |

X = the used Theraband color. <sup>a</sup>Ratings of perceived exertion according to the Borg scale.

**Table S3.** Categories of the Brief ICF Core Set for osteoarthritis.

| ICF component                | Chapter                                             | ICF code | ICF category title                          |
|------------------------------|-----------------------------------------------------|----------|---------------------------------------------|
| Body functions               | Sensory functions and pain                          | b280     | Sensation of pain                           |
|                              | Neuromusculoskeletal and movement-related functions | b710     | Mobility of joint functions                 |
|                              |                                                     | b730     | Muscle power functions                      |
| Body structures              | Structures related to movement                      | s730     | Structure of upper extremity                |
|                              |                                                     | s750     | Structure of lower extremity                |
|                              |                                                     | s799     | Structures related to movement, unspecified |
|                              |                                                     | d445     | Hand and arm use                            |
| Activities and participation | Mobility                                            | d450     | Walking                                     |
|                              | Self-care                                           | d540     | Dressing                                    |
| Environmental factors        | Products and technology                             | e115     | Products and technology for personal living |

|                                |      |                                                                                       |                 |
|--------------------------------|------|---------------------------------------------------------------------------------------|-----------------|
|                                |      | Design, construction and building products and technology of buildings for public use | None identified |
| Support and relationships      | e150 |                                                                                       |                 |
|                                | e310 | Immediate family                                                                      | None identified |
| Services, systems and policies | e580 | Health services, systems and policies                                                 | None identified |

ROM, range of motion (degree); GS, gait speed (m/s); TCS, Timed chair stand (repetition); WOMAC–Pain, Western Ontario & McMaster Universities Osteoarthritis Index, pain subscale; WOMAC–PF, Western Ontario & McMaster Universities Osteoarthritis Index, physical difficulty subscale; AML, appendicular mass index (kg/m<sup>2</sup>). WOMAC-PF difficulty-ranked items: 9, Putting on socks; 11, Taking off socks.
